# Supplementary material for: Multifrequency Low-level Laser-Assisted Mastopexy with Lipolaser LPL9002™ in 231 Consecutive Patients Dataset
Source: Preprints.org preprint supplement (doi:10.20944/preprints202407.0100.v1), 2024-07-02
Supplement: Supplementary file 1 [file supplementary]

## Sheet: Patients data
Patient number	Sugery date	Age	Age groups	Ethiciy	Marital status	Weight(kg)	Height(metres)	BMI	Ponderal diagnosis WHO	Previous weigth loss	Complications incidence	Clavien-Dindo type	Complication type	Complication treatment	NSSD before surgery RB	NSSD before surgery LB	NSSD 1st month RB	NSSD 1st month LB	NSSD 2nd month RB	NSSD 2nd month LB	NSSD 3rd month RB	NSSD 3rd month LB	Ptosis degree at baseline	Ptosis degree 1st month	Ptosis degree at 2nd month	Ptosis degree at 3rd month	Pregnancy numbers	Breastfedding	Prolactin	Alcohol consumption	Tobacco consumption	Frequently medication	Diseases history	Contraception	Previous breast surgery	Menses	Prosthesis placement	Breast reduction
1	2021-02-10	37	30-39	Hispanic white	Married	64.1	1.61	24.73	Normal weight	No	No	Without complications	Without complications		24	26	20	21	19	20	19	20	3	1	1	1	1	Yes	14.56	No	No	Colagen	None	No	Yes	Irregular	Yes	Yes
2	2021-02-17	31	30-39	Mixed	Single	71	1.63	26.72	Overweight	No	No	Without complications	Without complications		30	29	24	25	22	23	21	22	4	3	2	2	2	Yes	1.63	Yes	No	No	None	No	No	Regular	No	Yes
3	2021-02-26	43	40-49	Mixed	Married	98	1.64	36.44	Obesity II	Yes	Yes	IIIB	NAC necrosis	Surgical reconstruction	28	29	24	25	21	22	21	21	4	3	2	1	4	Yes	15.17	Yes	Yes	Levothyroxine	Hypothyroidism	No	Yes	Regular	No	Yes
4	2021-03-17	29	<30	Mixed	Single	81	1.65	29.75	Overweight	No	No	Without complications	Without complications		30	29	24	25	22	23	21	22	4	3	2	2	1	Yes	27.6	No	No	No	None	IUD	No	Irregular	Yes	Yes
5	2021-03-19	24	<30	Hispanic white	Single	56.7	1.6	22.15	Normal weight	No	No	Without complications	Without complications		23	23	20	20	19	19	18	18	2	1	1	1	0	No	31.73	No	No	No	None	Oral	No	Regular	Yes	No
6	2021-03-27	37	30-39	Mixed	Single	62.7	1.64	23.31	Normal weight	No	No	Without complications	Without complications		28	28	24	25	22	23	21	22	4	3	2	2	2	Yes	10.92	No	No	Ibuprofen	Migraine	No	Yes	Regular	Yes	Yes
7	2021-03-31	57	50-59	Mixed	Divorced	53.1	1.52	22.98	Normal weight	No	No	Without complications	Without complications		28	28	24	24	22	22	20	20	4	2	2	1	2	Yes	9.09	No	No	Citalopram	Depression	No	No	Histerectomy	No	Yes
8	2021-03-31	37	30-39	Mixed	Single	58.8	1.65	21.6	Normal weight	No	No	Without complications	Without complications		26	27	23	24	21	22	20	21	3	2	2	1	1	Yes	19.9	No	No	No	Alergic Rhinitis	No	Yes	Regular	Yes	Yes
9	2021-03-31	34	30-39	Mixed	Common-law relationship	70	1.6	27.34	Overweight	No	No	Without complications	Without complications		24	24	20	20	19	19	18	18	2	1	1	1	2	Yes	12.1	No	No	No	None	No	Yes	Regular	Yes	Yes
10	2021-04-10	30	30-39	Hispanic white	Common-law relationship	64	1.62	24.39	Normal weight	Yes	No	Without complications	Without complications		23	23	20	20	19	19	17	17	2	1	1	1	0	No	19.08	No	No	No	None	Oral	No	Regular	No	No
11	2021-04-11	43	40-49	Mixed	Divorced	58	1.55	24.14	Normal weight	No	No	Without complications	Without complications		25	24	20	20	18	18	16	16	3	1	1	1	2	Yes	24.38	No	No	No	None	condom	No	Regular	Yes	Yes
12	2021-04-11	44	40-49	Hispanic white	Married	95	1.68	33.66	Obesity I	Yes	No	Without complications	Without complications		34	32	25	25	23	23	20	20	4	3	2	1	3	Yes	18.2	No	No	No	None	POMEROY	Yes	Regular	Yes	Yes
13	2021-04-11	55	50-59	Mixed	Married	65	1.58	26.04	Overweight	No	No	Without complications	Without complications		27	28	23	23	21	21	20	20	4	2	1	1	1	Yes	10.29	No	No	Losartan/Amlodipina	Hypertension	No	Yes	Menopausia natural	Yes	Yes
14	2021-04-13	42	40-49	Mixed	Single	83	1.54	35	Obesity II	No	No	Without complications	Without complications		33	33	25	25	22	22	20	20	4	3	2	1	2	Yes	31.45	No	No	No	None	No	No	Regular	Yes	Yes
15	2021-06-09	59	50-59	Mixed	Married	60	1.6	23.44	Normal weight	No	No	Without complications	Without complications		28	28	22	22	20	20	19	18	4	2	1	1	2	Yes	13.2	No	No	No	None	No	No	Regular	Yes	No
16	2021-06-10	44	40-49	Mixed	Single	67	1.65	24.61	Normal weight	No	No	Without complications	Without complications		27	27	23	23	20	20	19	19	3	2	1	1	2	Yes	13.66	No	No	No	None	No	No	Regular	No	No
17	2021-06-11	25	<30	Hispanic white	Single	68	1.66	24.68	Normal weight	No	No	Without complications	Without complications		22	22	18	18	16	16	16	16	2	1	1	1	0	No	12.6	No	No	No	None	No	No	Regular	No	No
18	2021-06-12	41	40-49	Mixed	Common-law relationship	70	1.62	26.67	Overweight	Yes	No	Without complications	Without complications		31	29	26	25	22	23	20	21	4	3	2	1	3	Yes	13.2	No	No	No	None	Estradiol + Noretisterona 5/50mg	No	Irregular	Yes	Yes
19	2021-06-25	54	50-59	Mixed	Common-law relationship	73	1.55	30.39	Obesity I	No	No	Without complications	Without complications		30	29	24	25	22	23	21	21	4	3	2	1	4	Yes	17.2	No	No	No	Irritable bowel disease	No	No	Regular	No	Yes
20	2021-06-25	34	30-39	Mixed	Married	66	1.59	26.11	Overweight	No	Yes	IIIB	seroma	Surgical drainage	26	36	29	29	25	25	22	22	4	4	3	2	2	Yes	20.11	No	No	No	None	No	Yes	Menopausia natural	No	Yes
21	2021-06-26	33	30-39	Mixed	Married	80	1.63	30.11	Obesity I	No	No	Without complications	Without complications		30	33	23	25	22	23	21	22	4	3	2	2	2	Yes	13.46	No	No	No	None	No	No	Regular	Yes	Yes
22	2021-06-26	35	30-39	Mixed	Married	94	1.7	32.53	Obesity I	Yes	No	Without complications	Without complications		31	29	23	24	21	22	19	20	4	2	2	1	2	Yes	14.51	No	No	No	None	POMEROY	No	Regular	Yes	Yes
23	2021-06-29	26	<30	Mixed	Single	94	1.69	32.91	Obesity I	Yes	No	Without complications	Without complications		23	23	20	20	19	19	18	18	2	1	1	1	0	No	12.87	No	No	No	None	Oral	No	Regular	No	No
24	2021-06-30	40	40-49	Hispanic white	Married	84	1.57	34.08	Obesity I	Yes	No	Without complications	Without complications		35	32	26	25	22	23	20	21	4	3	2	1	2	Yes	25.98	No	No	No	None	Estradiol + Noretisterona 5/50mg	No	Irregular	No	Yes
25	2021-07-26	29	<30	Mixed	Married	69	1.68	24.45	Normal weight	Yes	No	Without complications	Without complications		25	25	20	20	18	18	17	16	3	1	1	1	1	Yes	63.59	Yes	No	No	None	No	No	Regular	Yes	No
26	2021-07-27	37	30-39	Mixed	Common-law relationship	68	1.64	25.28	Overweight	No	No	Without complications	Without complications		28	28	24	25	22	23	20	20	4	2	2	1	2	Yes	7.8	No	No	No	None	No	Yes	Irregular	Yes	No
27	2021-07-29	37	30-39	Hispanic white	Single	65	1.6	25.39	Overweight	No	No	Without complications	Without complications		27	28	21	22	19	20	18	19	4	2	1	1	0	No	159.8	No	No	No	None	Oral	Yes	Regular	No	No
28	2021-07-30	36	30-39	Hispanic white	Married	65	1.6	25.39	Overweight	No	No	Without complications	Without complications		34	31	27	24	22	21	19	20	4	3	2	1	0	No	16.2	No	No	No	None	No	No	Regular	No	Yes
29	2021-08-18	47	40-49	Mixed	Married	85	1.6	33.2	Obesity I	No	No	Without complications	Without complications		30	29	24	25	22	23	20	21	4	3	2	1	2	Yes	21.03	No	No	No	None	No	No	Regular	No	Yes
30	2021-08-20	29	<30	Mixed	Married	71	1.64	26.4	Overweight	Yes	Yes	I	Generalised pain	Analgesic	30	32	24	25	21	22	19	20	4	3	2	1	2	Yes	5.01	No	No	No	None	No	No	Regular	No	Yes
31	2021-08-21	40	40-49	Mixed	Single	78	1.59	30.85	Obesity I	Yes	No	Without complications	Without complications		36	35	29	29	26	26	23	23	4	4	3	2	2	Yes	21.14	No	No	No	HL	No	No	Regular	No	Yes
32	2021-09-01	55	50-59	Hispanic white	Married	135	1.71	46.17	Obesity III	Yes	No	Without complications	Without complications		31	30	24	25	22	23	20	20	4	3	2	1	0	No	12.64	No	No	No	Hypertension	No	No	Irregular	No	Yes
33	2021-09-01	47	40-49	Hispanic white	Married	76	1.61	29.32	Overweight	No	No	Without complications	Without complications		30	29	24	25	22	23	21	22	4	3	2	2	2	Yes	11.27	No	No	Levothyroxine	Hypothyroidism	No	No	Regular	Yes	Yes
34	2021-09-08	51	50-59	Mixed	Single	61	1.63	22.96	Normal weight	No	No	Without complications	Without complications		28	28	24	25	21	21	18	19	4	3	2	1	1	Yes	9.2	No	No	No	None	No	No	Irregular	No	No
35	2021-09-08	48	40-49	Mixed	Single	84	1.73	28.07	Overweight	No	No	Without complications	Without complications		32	32	24	24	22	22	20	20	4	2	2	1	1	Yes	10.8	No	No	No	None	No	No	Irregular	No	Yes
36	2021-09-11	38	30-39	African-Colombian	Common-law relationship	108	1.67	38.72	Obesity II	No	Yes	I	Generalised pain	Analgesic	30	29	24	25	22	23	21	21	4	3	2	1	1	Yes	20.03	No	No	Cannabis	Depression	No	No	Irregular	Yes	Yes
37	2021-09-13	35	30-39	Mixed	Married	73	1.57	29.62	Overweight	Yes	No	Without complications	Without complications		33	33	24	24	22	22	19	19	4	2	2	1	2	Yes	18.43	No	No	No	None	No	No	Regular	No	Yes
38	2021-09-14	56	50-59	Mixed	Single	83	1.56	34.11	Obesity I	Yes	No	Without complications	Without complications		32	32	25	25	22	22	20	20	4	3	2	1	3	Yes	7.77	No	Yes	No	None	No	No	Menopausia natural	Yes	Yes
39	2021-09-17	45	40-49	African-Colombian	Married	82	1.71	28.04	Overweight	Yes	No	Without complications	Without complications		26	26	21	21	19	19	17	18	3	1	1	1	2	Yes	3.95	No	No	No	None	No	No	Regular	No	Yes
40	2021-10-01	36	30-39	Mixed	Single	64	1.51	28.07	Overweight	No	No	Without complications	Without complications		30	29	24	25	22	23	21	20	4	3	2	1	0	No	8.52	No	No	No	None	No	No	Regular	No	Yes
41	2021-10-02	35	30-39	Mixed	Common-law relationship	69.4	1.6	27.11	Overweight	No	No	Without complications	Without complications		28	28	21	21	20	20	18	19	4	1	1	1	0	No	9.5	No	No	No	None	No	No	Regular	No	Yes
42	2021-10-04	40	40-49	Mixed	Single	73	1.54	30.78	Obesity I	No	No	Without complications	Without complications		27	28	22	23	20	21	17	18	4	2	1	1	0	No	18.21	No	No	No	None	No	No	Regular	No	Yes
43	2021-10-04	56	50-59	Mixed	Common-law relationship	60	1.56	24.65	Normal weight	No	No	Without complications	Without complications		27	28	22	21	20	19	17	18	3	2	1	1	0	No	15.9	Yes	No	Levothyroxine	Hypothyroidism	No	No	Menopausia natural	No	Yes
44	2021-10-05	36	30-39	Mixed	Common-law relationship	67	1.58	26.84	Overweight	No	No	Without complications	Without complications		33	32	27	27	23	23	20	21	4	3	2	1	2	Yes	18.6	No	No	Levothyroxine	Hypothyroidism	POMEROY	Yes	Regular	Yes	Yes
45	2021-10-08	35	30-39	Mixed	Married	65	1.7	22.49	Normal weight	No	No	Without complications	Without complications		26	27	21	21	20	20	18	18	3	1	1	1	1	Yes	25.23	No	No	Levothyroxine	Hypothyroidism	No	No	Regular	No	Yes
46	2021-10-08	34	30-39	Mixed	Common-law relationship	55	1.61	21.22	Normal weight	Yes	No	Without complications	Without complications		33	34	27	27	23	23	21	21	4	3	2	1	1	Yes	30.61	No	No	No	None	No	Yes	Regular	Yes	Yes
47	2021-10-09	31	30-39	Mixed	Married	70	1.55	29.14	Overweight	No	No	Without complications	Without complications		27	28	22	23	20	20	18	17	3	2	1	1	1	Yes	24.81	No	No	No	None	No	No	Regular	Yes	Yes
48	2021-10-11	35	30-39	Mixed	Married	97	1.65	35.63	Obesity II	Yes	No	Without complications	Without complications		26	27	21	22	19	19	17	17	3	2	1	1	0	No	66.38	No	No	No	None	condom	Yes	Regular	No	Yes
49	2021-10-12	42	40-49	Hispanic white	Married	67	1.57	27.18	Normal weight	Yes	No	Without complications	Without complications		27	29	21	20	19	19	17	16	4	1	1	1	1	Yes	16.93	No	No	Levothyroxine	Hypothyroidism	No	No	Regular	Yes	Yes
50	2021-10-12	49	40-49	Mixed	Common-law relationship	73	1.52	31.6	Obesity I	Yes	No	Without complications	Without complications		25	26	21	21	19	19	17	16	3	1	1	1	2	Yes	23.5	No	No	No	None	No	Yes	Regular	Yes	Yes
51	2021-10-16	34	30-39	Mixed	Common-law relationship	82	1.66	29.76	Overweight	Yes	No	Without complications	Without complications		26	26	22	21	19	19	17	16	3	2	1	1	1	Yes	13.93	No	No	No	None	Oral	No	Irregular	Yes	Yes
52	2021-10-19	36	30-39	Mixed	Common-law relationship	56	1.57	22.72	Overweight	Yes	No	Without complications	Without complications		28	26	21	21	19	19	17	16	4	1	1	1	1	Yes	10.55	Yes	Yes	No	None	No	No	Regular	Yes	Yes
53	2021-10-26	50	50-59	Mixed	Married	71	1.6	27.73	Overweight	Yes	No	Without complications	Without complications		27	26	21	21	19	19	17	16	3	1	1	1	2	Yes	10.92	Yes	No	No	None	No	No	Irregular	No	Yes
54	2021-10-26	42	40-49	Mixed	Divorced	67.3	1.59	26.62	Overweight	No	No	Without complications	Without complications		26	26	21	21	20	20	20	20	3	1	1	1	3	Yes	33.4	No	No	No	None	No	Yes	Regular	Yes	Yes
55	2021-10-27	56	50-59	Mixed	Divorced	64	1.59	25.32	Overweight	No	No	Without complications	Without complications		26	26	21	21	19	19	17	16	3	1	1	1	2	Yes	4.89	No	No	No	None	No	Yes	Histerectomy	No	Yes
56	2021-10-29	30	30-39	African-Colombian	Single	96	1.57	38.95	Obesity II	No	No	Without complications	Without complications		33	32	27	27	23	23	21	21	4	3	2	1	1	Yes	22.31	No	No	No	None	No	No	Regular	No	Yes
57	2021-11-04	31	30-39	Mixed	Married	58	1.51	25.44	Overweight	No	No	Without complications	Without complications		27	26	20	21	19	19	17	16	3	1	1	1	2	Yes	26.6	No	No	No	None	No	No	Irregular	Yes	Yes
58	2021-11-04	35	30-39	Mixed	Married	62	1.56	25.48	Overweight	No	No	Without complications	Without complications		27	26	21	21	19	19	17	16	3	1	1	1	1	Yes	9.89	No	No	No	None	Oral	No	Regular	Yes	Yes
59	2021-11-06	37	30-39	Mixed	Married	67	1.7	23.18	Normal weight	Yes	No	Without complications	Without complications		27	28	21	20	19	19	17	16	4	1	1	1	1	Yes	7.08	No	No	No	None	Estradiol + Noretisterona 5/50mg	Yes	Irregular	Yes	Yes
60	2021-11-11	45	40-49	Mixed	Single	100	1.58	40.06	Obesity III	No	No	Without complications	Without complications		33	32	27	27	23	23	21	21	4	3	2	1	2	Yes	12.01	No	No	No	None	POMEROY	No	Regular	Yes	Yes
61	2021-11-12	39	30-39	Mixed	Married	61	1.49	27.48	Overweight	Yes	No	Without complications	Without complications		29	26	21	21	19	19	16	16	4	1	1	1	2	Yes	14.92	No	No	No	None	Estradiol + Noretisterona 5/50mg	No	Irregular	Yes	Yes
62	2021-11-12	41	40-49	Mixed	Single	75	1.52	32.46	Obesity I	No	No	Without complications	Without complications		27	26	21	21	19	18	16	16	3	1	1	1	2	Yes	25.85	Yes	No	No	None	No	No	Irregular	Yes	Yes
63	2021-11-12	32	30-39	Mixed	Married	53	1.49	23.87	Normal weight	No	No	Without complications	Without complications		33	33	27	27	23	23	21	21	4	3	2	1	2	Yes	11.46	No	No	No	None	POMEROY	No	Irregular	Yes	Yes
64	2021-11-16	36	30-39	Hispanic white	Married	58	1.59	22.94	Normal weight	No	No	Without complications	Without complications		27	28	21	21	19	19	17	16	4	1	1	1	1	Yes	6.79	No	No	No	None	No	No	Regular	No	Yes
65	2021-11-16	35	30-39	Hispanic white	Married	52	1.53	22.21	Normal weight	No	No	Without complications	Without complications		28	26	21	21	19	19	17	16	4	1	1	1	1	Yes	23.06	Yes	No	No	None	condom	Yes	Regular	Yes	Yes
66	2021-11-17	38	30-39	Mixed	Single	60	1.56	24.65	Normal weight	No	No	Without complications	Without complications		33	32	27	27	23	23	21	21	4	3	2	1	3	Yes	294	No	No	No	None	POMEROY	No	Irregular	Yes	Yes
67	2021-11-17	35	30-39	Mixed	Common-law relationship	74	1.6	28.91	Overweight	No	No	Without complications	Without complications		27	29	21	20	19	19	17	16	4	1	1	1	2	Yes	14.98	No	No	No	None	No	Yes	Regular	Yes	Yes
68	2021-11-19	60	60-69	Mixed	Single	60	1.57	24.34	Normal weight	No	No	Without complications	Without complications		36	32	27	26	23	23	21	21	4	3	2	1	2	Yes	9.02	No	No	Levothyroxine	Hypothyroidism	No	No	Regular	No	Yes
69	2021-11-24	44	40-49	Mixed	Married	68	1.66	24.68	Normal weight	No	No	Without complications	Without complications		30	29	27	25	22	23	21	22	4	3	2	2	1	Yes	9.8	Yes	No	Levothyroxine	Hypothyroidism	No	No	Menopausia natural	Yes	Yes
70	2021-11-25	54	50-59	Mixed	Married	71	1.58	28.44	Overweight	No	No	Without complications	Without complications		33	32	27	27	23	23	21	21	4	3	2	1	1	Yes	6.32	No	No	Levothyroxine	Hypothyroidism	No	Yes	Menopausia natural	Yes	Yes
71	2021-11-27	34	30-39	Mixed	Single	87	1.82	26.26	Overweight	No	No	Without complications	Without complications		27	26	21	21	19	19	17	16	3	1	1	1	2	Yes	21.11	No	Yes	No	None	Estradiol + Noretisterona 5/50mg	No	Irregular	Yes	Yes
72	2021-11-29	34	30-39	Hispanic white	Married	71	1.51	31.14	Obesity I	Yes	No	Without complications	Without complications		33	32	27	27	23	23	21	21	4	3	2	1	1	Yes	22.25	No	No	No	None	No	No	Regular	No	Yes
73	2021-11-29	26	<30	Mixed	Single	54	1.57	21.91	Normal weight	No	No	Without complications	Without complications		27	26	21	21	19	19	17	16	3	1	1	1	0	No	15.2	No	No	No	None	Estradiol + Noretisterona 5/50mg	Yes	Irregular	Yes	Yes
74	2021-12-01	34	30-39	Mixed	Common-law relationship	98	1.71	33.51	Obesity I	No	No	Without complications	Without complications		27	26	21	21	19	19	17	16	3	1	1	1	2	Yes	17.55	No	No	No	None	POMEROY	Yes	Irregular	No	Yes
75	2021-12-02	42	40-49	Mixed	Married	58	1.64	21.56	Normal weight	Yes	No	Without complications	Without complications		30	31	24	25	22	23	21	22	4	3	2	2	0	No	18.52	No	No	No	None	Estradiol + Noretisterona 5/50mg	No	Irregular	Yes	Yes
76	2021-12-06	39	30-39	Mixed	Married	72	1.51	31.58	Obesity I	Yes	No	Without complications	Without complications		36	37	26	27	23	23	20	20	4	3	2	1	1	Yes	16.61	Yes	No	No	None	Estradiol + Noretisterona 5/50mg	Yes	Irregular	No	Yes
77	2021-12-06	19	<30	Mixed	Single	75	1.61	28.93	Overweight	Yes	No	Without complications	Without complications		33	34	27	26	23	23	21	21	4	3	2	1	0	No	17.12	No	No	No	None	No	No	Regular	No	Yes
78	2021-12-06	45	40-49	Mixed	Single	62	1.6	24.22	Normal weight	No	No	Without complications	Without complications		33	36	27	27	23	23	21	21	4	3	2	1	2	Yes	13.7	No	No	No	None	POMEROY	Yes	Regular	Yes	Yes
79	2021-12-10	32	30-39	Mixed	Single	74	1.64	27.51	Overweight	Yes	No	Without complications	Without complications		23	23	19	19	17	18	16	16	2	1	1	1	0	No	26.63	No	No	No	None	No	Yes	Regular	Yes	No
80	2021-12-10	37	30-39	Mixed	Married	69	1.55	28.72	Overweight	Yes	No	Without complications	Without complications		27	26	21	20	19	19	17	16	3	1	1	1	1	Yes	11.2	Yes	No	No	None	No	No	Regular	No	Yes
81	2021-12-11	38	30-39	Mixed	Married	81	1.59	32.04	Obesity I	Yes	No	Without complications	Without complications		23	23	20	20	18	19	17	17	2	1	1	1	2	Yes	16.83	No	No	No	None	IUD	No	Regular	No	No
82	2021-12-13	44	40-49	Mixed	Married	62	1.56	25.48	Overweight	No	No	Without complications	Without complications		27	26	21	21	19	19	17	16	3	1	1	1	1	Yes	1.86	No	No	No	None	Estradiol + Noretisterona 5/50mg	No	Irregular	Yes	Yes
83	2021-12-15	36	30-39	Mixed	Single	88	1.68	31.18	Obesity I	No	No	Without complications	Without complications		30	29	24	25	22	23	21	22	4	3	2	2	0	No	15.2	No	No	No	None	No	No	Regular	No	Yes
84	2022-01-02	27	<30	Hispanic white	Married	63.5	1.63	23.9	Normal weight	No	No	Without complications	Without complications		25	25	23	23	21	21	20	20	3	2	1	1	0	No	23.4	No	Yes	No	None	No	No	Regular	No	No
85	2022-01-07	36	30-39	Mixed	Common-law relationship	94	1.68	33.3	Obesity I	Yes	No	Without complications	Without complications		27	26	21	21	19	19	17	16	3	1	1	1	3	Yes	9.63	No	No	No	Migraine	POMEROY	No	Regular	Yes	No
86	2022-01-12	61	60-69	Mixed	Single	60	1.52	25.97	Overweight	No	No	Without complications	Without complications		33	32	27	27	23	23	21	21	4	3	2	1	2	Yes	10.3	No	No	Amlodipine-valsartan	Hypertension	No	Yes	Menopausia natural	Yes	Yes
87	2022-01-14	58	50-59	Mixed	Divorced	57	1.56	23.42	Normal weight	No	No	Without complications	Without complications		27	26	21	21	19	19	17	16	3	1	1	1	2	Yes	14.67	Yes	No	Levothyroxine	Hypothyroidism	No	Yes	Menopausia natural	Yes	Yes
88	2022-01-17	22	<30	Mixed	Single	113	1.59	44.7	Obesity III	Yes	No	Without complications	Without complications		33	32	27	27	23	23	21	21	4	3	2	1	0	No	9.79	No	No	No	Insulin resistance	No	No	Regular	No	Yes
89	2022-01-21	39	30-39	Mixed	Married	90	1.6	35.16	Obesity II	No	No	Without complications	Without complications		35	33	26	25	23	23	21	21	4	3	2	1	1	Yes	20.7	No	No	No	None	No	No	Regular	Yes	Yes
90	2022-01-22	47	40-49	Mixed	Single	82	1.56	33.69	Obesity I	No	No	Without complications	Without complications		22	22	20	20	17	18	16	16	2	1	1	1	2	Yes	13.2	No	No	Losartan	Hypertension	POMEROY	Yes	Irregular	No	No
91	2022-01-22	48	40-49	Hispanic white	Single	57	1.59	22.55	Normal weight	No	No	Without complications	Without complications		27	26	21	21	19	19	17	16	3	1	1	1	1	Yes	8.62	No	No	No	None	POMEROY	No	Regular	No	Yes
92	2022-01-26	31	30-39	African-Colombian	Married	72	1.65	26.45	Overweight	No	No	Without complications	Without complications		27	26	21	21	19	19	17	16	3	1	1	1	1	Yes	1.28	No	No	No	None	No	No	Regular	No	Yes
93	2022-02-07	37	30-39	Hispanic white	Common-law relationship	62	1.65	22.77	Normal weight	No	No	Without complications	Without complications		27	27	21	21	19	19	17	16	3	1	1	1	5	Yes	40.78	No	No	No	None	No	Yes	Irregular	Yes	No
94	2022-02-09	51	50-59	Hispanic white	Single	104.8	1.63	39.44	Obesity II	Yes	No	Without complications	Without complications		25	26	20	20	18	18	17	17	3	1	1	1	6	Yes	4.8	No	Yes	No	None	No	No	Histerectomy	No	No
95	2022-02-18	52	50-59	Mixed	Married	70	1.6	27.34	Overweight	No	No	Without complications	Without complications		27	26	21	21	19	19	17	16	3	1	1	1	2	Yes	34.8	No	No	Hidroxicloroquine	Lupus	No	Yes	Histerectomy	Yes	No
96	2022-02-21	62	60-69	Mixed	Married	62	1.51	27.19	Overweight	No	No	Without complications	Without complications		27	26	21	21	19	19	17	16	3	1	1	1	3	Yes	10.49	No	No	No	None	Oral	Yes	No	Yes	No
97	2022-02-21	46	40-49	Hispanic white	Married	94	1.59	37.18	Obesity II	Yes	No	Without complications	Without complications		23	26	20	20	19	19	18	18	3	1	1	1	3	Yes	16.67	No	No	No	None	POMEROY	No	No	Yes	Yes
98	2022-02-23	47	40-49	Hispanic white	Single	66	1.59	26.11	Overweight	No	No	Without complications	Without complications		33	23	27	26	23	23	21	21	4	3	2	1	0	No	9.8	No	No	No	None	No	No	Histerectomy	No	No
99	2022-02-25	43	40-49	Mixed	Married	85	1.62	32.39	Obesity I	No	No	Without complications	Without complications		23	32	20	20	19	19	18	18	4	1	1	1	2	Yes	12.5	No	No	Levothyroxine	Hypothyroidism	No	No	Regular	No	No
100	2022-02-25	35	30-39	Mixed	Common-law relationship	84	1.59	33.23	Obesity I	Yes	No	Without complications	Without complications		27	23	21	21	19	19	17	16	3	1	1	1	2	Yes	11.11	No	No	No	None	POMEROY	No	Regular	Yes	Yes
101	2022-03-02	38	30-39	Mixed	Married	69	1.55	28.72	Overweight	No	No	Without complications	Without complications		27	28	21	21	19	19	17	16	4	1	1	1	1	Yes	11.2	No	No	No	None	No	No	Regular	No	Yes
102	2022-03-04	34	30-39	Mixed	Married	90	1.66	32.66	Obesity I	No	No	Without complications	Without complications		27	28	21	20	19	19	17	16	4	1	1	1	3	Yes	11.9	No	No	No	None	No	No	Regular	Yes	Yes
103	2022-03-05	27	<30	Hispanic white	Single	100	1.64	37.18	Obesity II	No	No	Without complications	Without complications		27	28	21	21	19	19	17	16	4	1	1	1	0	No	24.5	No	No	No	None	Oral	No	Regular	No	Yes
104	2022-03-11	20	<30	Mixed	Single	102.6	1.62	39.09	Obesity III	Yes	No	Without complications	Without complications		23	23	19	20	17	18	16	17	2	1	1	1	0	No	16.9	No	No	No	None	No	No	Regular	No	No
105	2022-03-11	34	30-39	Mixed	Single	54	1.53	23.07	Normal weight	No	No	Without complications	Without complications		23	23	19	19	17	18	16	16	2	1	1	1	1	Yes	12.79	No	No	No	None	Oral	Yes	Regular	Yes	No
106	2022-03-11	59	50-59	Mixed	Single	66	1.66	23.95	Normal weight	No	No	Without complications	Without complications		28	26	21	21	19	19	17	16	4	1	1	1	4	Yes	10.1	No	No	No	None	No	Yes	Menopausia natural	No	Yes
107	2022-03-11	30	30-39	Mixed	Single	92	1.6	35.94	Obesity II	Yes	No	Without complications	Without complications		27	26	21	21	19	19	17	16	3	1	1	1	1	Yes	8.14	No	No	No	None	Oral	No	Regular	Yes	Yes
108	2022-03-11	40	40-49	Mixed	Married	69	1.62	26.29	Overweight	No	No	Without complications	Without complications		27	26	21	21	19	19	17	16	3	1	1	1	2	Yes	9.57	No	No	No	None	No	Yes	Regular	Yes	Yes
109	2022-03-18	30	30-39	Hispanic white	Single	49	1.59	19.38	Normal weight	No	No	Without complications	Without complications		23	23	19	19	17	17	16	16	2	1	1	1	0	No	36.3	No	No	Clonazepam	Depression	Oral	Yes	Regular	Yes	No
110	2022-03-18	53	50-59	Mixed	Divorced	74	1.67	26.53	Overweight	No	No	Without complications	Without complications		22	22	18	18	16	16	16	16	2	1	1	1	0	No	5.22	No	No	Mirtazapin	Depression	No	No	Histerectomy	Yes	No
111	2022-03-18	48	40-49	Mixed	Common-law relationship	62	1.54	26.14	Overweight	No	No	Without complications	Without complications		27	26	21	21	19	19	17	16	3	1	1	1	4	Yes	15.77	No	No	No	None	Oral	Yes	Regular	No	Yes
112	2022-03-18	56	50-59	Mixed	Married	79	1.53	33.75	Obesity I	No	No	Without complications	Without complications		27	26	21	21	19	19	17	16	3	1	1	1	3	Yes	12.02	No	No	No	None	No	No	Histerectomy	No	Yes
113	2022-03-19	42	40-49	Mixed	Common-law relationship	60	1.63	22.58	Normal weight	No	No	Without complications	Without complications		27	26	21	21	19	19	16	16	3	1	1	1	1	Yes	13.93	No	No	No	None	No	Yes	Regular	No	Yes
114	2022-03-19	35	30-39	Hispanic white	Common-law relationship	57	1.6	22.27	Normal weight	No	No	Without complications	Without complications		33	32	27	27	23	23	21	21	4	3	2	1	0	No	10.05	No	No	No	None	No	Yes	Regular	Yes	Yes
115	2022-03-22	46	40-49	Mixed	Married	65	1.52	28.13	Overweight	No	No	Without complications	Without complications		33	34	27	27	23	23	21	20	4	3	2	1	1	Yes	13.64	No	No	No	None	POMEROY	Yes	Regular	No	Yes
116	2022-03-22	47	40-49	Hispanic white	Single	69	1.52	29.86	Overweight	No	No	Without complications	Without complications		27	26	21	21	19	19	17	16	3	1	1	1	3	Yes	11.42	No	No	Losartan	None	POMEROY	Yes	Regular	Yes	Yes
117	2022-04-01	28	<30	Mixed	Married	83	1.58	33.25	Obesity I	No	No	Without complications	Without complications		27	29	21	20	19	18	17	16	4	1	1	1	2	Yes	6.47	No	No	No	Hypertension	No	No	Regular	No	Yes
118	2022-04-01	38	30-39	Mixed	Married	65	1.6	25.39	Overweight	No	No	Without complications	Without complications		27	26	21	21	19	19	17	16	3	1	1	1	2	Yes	16.13	No	No	No	None	POMEROY	No	Regular	No	Yes
119	2022-04-01	50	50-59	Mixed	Married	72	1.58	28.84	Overweight	No	Yes	IIIB	Seroma	Surgical drainage	27	26	20	21	19	19	16	16	3	1	1	1	4	Yes	10.11	No	No	Levothyroxine	Hypothyroidism	No	No	Regular	Yes	Yes
120	2022-04-02	32	30-39	Mixed	Single	96	1.63	36.13	Obesity II	No	No	Without complications	Without complications		23	23	19	19	17	17	17	16	2	1	1	1	1	Yes	25.01	No	No	No	None	No	No	Regular	No	No
121	2022-04-02	37	30-39	Hispanic white	Married	72	1.65	26.45	Overweight	No	No	Without complications	Without complications		27	26	21	21	19	19	17	16	3	1	1	1	0	No	18.65	No	No	Levothyroxine	Hypothyroidism	No	No	Irregular	No	Yes
122	2022-04-04	43	40-49	Mixed	Married	126	1.58	50.47	Obesity III	Yes	No	Without complications	Without complications		22	22	19	18	17	16	16	15	2	1	1	1	3	Yes	2.59	No	No	No	None	Oral	No	Irregular	No	No
123	2022-04-07	39	30-39	Hispanic white	Married	78	1.66	28.31	Overweight	Yes	No	Without complications	Without complications		27	28	21	22	19	18	17	16	4	2	1	1	0	No	20.02	No	No	Levothyroxine	Hypothyroidism	No	No	Irregular	Yes	No
124	2022-04-07	39	30-39	Mixed	Married	93	1.58	37.25	Obesity II	Yes	No	Without complications	Without complications		27	26	20	21	19	19	17	16	3	1	1	1	1	Yes	14.45	Yes	Yes	No	None	Estradiol + Noretisterona 5/50mg	No	Irregular	No	Yes
125	2022-04-08	43	40-49	Mixed	Married	72	1.63	27.1	Overweight	No	No	Without complications	Without complications		27	26	21	21	19	19	17	16	3	1	1	1	2	Yes	53.16	No	No	Levothyroxine	Hypothyroidism	No	No	Regular	No	Yes
126	2022-04-08	57	50-59	Mixed	Single	75	1.5	33.33	Obesity I	Yes	No	Without complications	Without complications		33	32	27	27	23	23	21	20	4	3	2	1	2	Yes	13.3	No	No	No	None	No	No	Regular	No	Yes
127	2022-04-09	55	50-59	Mixed	Married	80	1.54	33.73	Obesity I	No	No	Without complications	Without complications		33	32	27	27	23	23	21	21	4	3	2	1	4	Yes	15	No	No	No	None	No	No	No	No	Yes
128	2022-04-12	47	40-49	Mixed	Single	72	1.58	28.84	Overweight	Yes	No	Without complications	Without complications		27	26	21	21	19	19	17	16	3	1	1	1	3	Yes	13.2	No	No	No	None	No	No	Regular	No	Yes
129	2022-04-12	43	40-49	Mixed	Married	70	1.59	27.69	Overweight	No	No	Without complications	Without complications		39	39	27	27	23	24	21	20	4	3	2	1	2	Yes	16.98	No	No	No	None	POMEROY	No	Regular	No	Yes
130	2022-04-12	38	30-39	Mixed	Single	86	1.72	29.07	Overweight	No	No	Without complications	Without complications		27	26	21	21	19	19	17	16	3	1	1	1	1	Yes	33.3	No	No	Levothyroxine	Hypothyroidism	No	No	Regular	Yes	Yes
131	2022-04-13	49	40-49	Mixed	Married	79	1.56	32.46	Obesity I	Yes	No	Without complications	Without complications		23	22	18	18	16	16	15	16	2	1	1	1	2	Yes	15.12	No	No	Losartan	Hypertension	No	No	Regular	No	No
132	2022-04-13	50	50-59	Mixed	Married	71	1.56	29.17	Overweight	No	No	Without complications	Without complications		27	26	21	21	19	19	17	16	3	1	1	1	1	Yes	8.38	Yes	No	No	None	No	No	Regular	No	Yes
133	2022-04-18	33	30-39	African-Colombian	Married	99	1.73	33.08	Obesity I	Yes	No	Without complications	Without complications		35	37	27	26	23	22	21	20	4	3	2	1	3	Yes	5.1	No	No	Losartan	Hypertension	No	No	Regular	No	Yes
134	2022-04-18	41	40-49	Mixed	Single	94	1.7	32.53	Obesity I	Yes	Yes	IIIB	NAC necrosis	Surgical reconstruction	33	32	27	27	23	23	21	21	4	3	2	1	1	Yes	11.72	Yes	No	Clonazepam	Depression	No	Yes	Irregular	Yes	Yes
135	2022-04-20	33	30-39	Mixed	Married	71	1.56	29.17	Overweight	No	No	Without complications	Without complications		27	26	21	21	19	19	17	16	3	1	1	1	2	Yes	8.75	No	No	Metformin	Pre-diabetes	No	Yes	Regular	No	Yes
136	2022-04-23	38	30-39	Hispanic white	Married	79	1.64	29.37	Overweight	Yes	No	Without complications	Without complications		22	22	18	19	17	18	16	16	2	1	1	1	2	Yes	4.44	No	No	Metformin	Pre-diabetes	POMEROY	No	Regular	Yes	No
137	2022-04-29	32	30-39	Mixed	Married	70	1.55	29.14	Overweight	Yes	No	Without complications	Without complications		28	26	21	21	19	19	17	16	4	1	1	1	1	Yes	21.48	No	No	No	None	IUD	Yes	Regular	No	Yes
138	2022-04-30	28	<30	Mixed	Married	96	1.6	37.5	Obesity II	Yes	No	Without complications	Without complications		33	36	27	27	23	23	21	21	4	3	2	1	0	No	33.6	No	No	Telmisartan	Hypertension	No	No	Regular	No	Yes
139	2022-05-04	41	40-49	Mixed	Married	80	1.59	31.64	Obesity I	Yes	No	Without complications	Without complications		27	26	21	21	19	19	17	16	3	1	1	1	4	Yes	17.2	No	No	Metformin	Pre-diabetes	No	No	Irregular	No	Yes
140	2022-05-04	41	40-49	Mixed	Common-law relationship	84	1.6	32.81	Obesity I	No	No	Without complications	Without complications		29	26	21	21	19	19	17	16	4	1	1	1	0	No	17.7	No	No	No	None	No	Yes	Regular	No	Yes
141	2022-05-04	57	50-59	Hispanic white	Married	69	1.58	27.64	Overweight	No	No	Without complications	Without complications		27	29	24	25	22	23	21	22	4	3	2	2	3	Yes	5.64	No	No	No	None	No	Yes	Histerectomy	No	Yes
142	2022-05-06	38	30-39	Mixed	Married	90	1.67	32.27	Obesity I	Yes	No	Without complications	Without complications		33	32	27	27	23	23	21	21	4	3	2	1	0	No	50.79	No	No	No	None	No	No	Regular	No	Yes
143	2022-05-06	52	50-59	Hispanic white	Single	81	1.69	28.36	Overweight	Yes	No	Without complications	Without complications		36	38	27	27	23	23	21	21	4	3	2	1	1	Yes	28.4	No	No	No	None	POMEROY	No	Regular	No	Yes
144	2022-05-07	48	40-49	Mixed	Married	89	1.6	34.77	Obesity I	Yes	Yes	IIIB	NAC necrosis	Surgical reconstruction	27	26	21	21	19	19	17	16	3	1	1	1	1	Yes	44.9	No	No	Metformin	Pre-diabetes	condom	No	Regular	Yes	Yes
145	2022-05-09	45	40-49	Mixed	Married	63	1.57	25.56	Overweight	No	No	Without complications	Without complications		33	36	27	27	23	23	21	21	4	3	2	1	2	Yes	8.86	Yes	No	No	None	No	No	Regular	No	Yes
146	2022-05-09	46	40-49	Mixed	Common-law relationship	68	1.67	24.38	Normal weight	No	No	Without complications	Without complications		27	29	21	20	19	19	17	16	4	1	1	1	2	Yes	40	No	No	Alprazolam	Depression	No	Yes	Irregular	Yes	Yes
147	2022-05-11	32	30-39	Mixed	Common-law relationship	89	1.67	31.91	Obesity I	Yes	No	Without complications	Without complications		27	28	21	21	19	19	17	16	4	1	1	1	1	Yes	88.8	No	No	Metformin	Pre-diabetes	No	No	Regular	No	Yes
148	2022-05-13	39	30-39	Mixed	Married	54	1.6	21.09	Normal weight	No	No	Without complications	Without complications		23	22	18	17	17	16	16	16	2	1	1	1	3	Yes	16.56	No	No	Levothyroxine	Hypothyroidism	No	No	Irregular	No	No
149	2022-05-13	49	40-49	Mixed	Married	69	1.64	25.65	Overweight	Yes	No	Without complications	Without complications		26	26	21	20	19	19	17	16	3	1	1	1	3	Yes	10.74	No	No	Levothyroxine	Hypothyroidism	No	Yes	Histerectomy	Yes	Yes
150	2022-05-14	39	30-39	Hispanic white	Married	92	1.63	34.63	Normal weight	Yes	No	Without complications	Without complications		25	25	20	20	19	19	16	16	3	1	1	1	0	No	23.7	No	No	No	None	No	No	Regular	Yes	Yes
151	2022-05-16	31	30-39	Hispanic white	Common-law relationship	59	1.57	23.94	Normal weight	Yes	No	Without complications	Without complications		26	26	21	21	19	18	16	16	3	1	1	1	1	Yes	9.21	Yes	Yes	No	None	IUD	No	Regular	No	Yes
152	2022-05-16	47	40-49	Hispanic white	Married	63	1.54	26.56	Overweight	Yes	No	Without complications	Without complications		33	32	27	27	23	23	21	21	4	3	2	1	2	Yes	12.66	No	No	No	None	No	No	Regular	No	Yes
153	2022-05-18	42	40-49	Mixed	Common-law relationship	87	1.61	33.56	Obesity I	Yes	No	Without complications	Without complications		39	38	27	27	23	23	21	21	4	3	2	1	2	Yes	41.21	No	No	No	None	No	No	Regular	No	Yes
154	2022-05-20	39	30-39	Mixed	Married	54	1.61	20.83	Normal weight	No	No	Without complications	Without complications		27	28	22	22	20	20	18	18	4	2	1	1	1	Yes	21.47	No	No	No	None	No	No	Irregular	Yes	Yes
155	2022-05-25	40	40-49	Mixed	Single	62	1.63	23.34	Normal weight	No	No	Without complications	Without complications		37	37	27	27	23	23	21	21	4	3	2	1	1	Yes	14.2	No	No	No	None	No	Yes	Regular	Yes	Yes
156	2022-05-27	19	<30	Hispanic white	Single	125	1.81	38.16	Obesity II	Yes	No	Without complications	Without complications		28	28	24	25	22	23	21	21	4	3	2	1	0	No	15.2	No	No	Cetirizine	Atopic dermatitis	No	No	Regular	No	Yes
157	2022-05-27	44	40-49	Hispanic white	Single	117	1.68	41.45	Obesity III	Yes	No	Without complications	Without complications		38	38	27	27	23	23	21	21	4	3	2	1	2	Yes	10.36	No	No	No	None	No	No	Regular	No	Yes
158	2022-05-27	45	40-49	Hispanic white	Married	59	1.58	23.63	Normal weight	No	No	Without complications	Without complications		36	36	26	26	23	23	21	21	4	3	2	1	1	Yes	9.19	Yes	No	Metformin	Pre-diabetes	No	Yes	Regular	Yes	Yes
159	2022-05-28	42	40-49	Mixed	Married	83	1.61	32.02	Obesity I	Yes	No	Without complications	Without complications		23	23	20	20	18	18	16	16	3	1	1	1	2	Yes	35.57	Yes	Yes	No	None	No	No	Regular	No	No
160	2022-05-31	45	40-49	Mixed	Common-law relationship	54	1.52	23.37	Overweight	No	No	Without complications	Without complications		28	28	23	23	20	20	19	19	4	2	1	1	2	Yes	9.95	No	No	No	None	No	No	Regular	No	Yes
161	2022-06-01	42	40-49	Hispanic white	Common-law relationship	54	1.6	21.09	Normal weight	Yes	No	Without complications	Without complications		26	27	21	22	20	20	19	19	3	1	1	1	2	Yes	27.8	No	No	Metformin	Pre-diabetes	No	Yes	Regular	Yes	Yes
162	2022-06-03	24	<30	Hispanic white	Married	59	1.62	22.48	Normal weight	Yes	No	Without complications	Without complications		28	27	23	23	20	20	19	19	4	2	1	1	2	Yes	7.7	No	No	Salbutamol	Asthma	No	No	Irregular	Yes	Yes
163	2022-06-06	40	40-49	Hispanic white	Married	62	1.5	27.56	Overweight	Yes	No	Without complications	Without complications		34	34	27	27	23	23	21	21	4	3	2	1	0	No	11.2	No	No	No	None	No	No	Regular	Yes	Yes
164	2022-06-08	53	50-59	Mixed	Married	77	1.57	31.24	Obesity I	Yes	No	Without complications	Without complications		33	36	27	25	23	22	21	20	4	3	2	1	1	Yes	37.67	No	No	Levothyroxine	Hypothyroidism	No	No	Regular	No	Yes
165	2022-06-08	55	50-59	Mixed	Married	70	1.6	27.34	Overweight	Yes	No	Without complications	Without complications		27	28	22	23	20	20	18	19	4	2	1	1	1	Yes	9.41	No	No	Levothyroxine	Hypothyroidism	No	No	Regular	No	Yes
166	2022-06-08	51	50-59	Mixed	Single	87	1.61	33.56	Obesity I	Yes	No	Without complications	Without complications		30	29	24	25	22	23	21	22	4	3	2	2	2	Yes	9.4	No	No	No	None	No	No	Regular	No	Yes
167	2022-06-10	45	40-49	Hispanic white	Married	67	1.73	22.39	Normal weight	No	No	Without complications	Without complications		23	23	20	20	19	19	16	16	2	1	1	1	1	Yes	26.7	No	No	No	None	No	Yes	Regular	Yes	No
168	2022-06-10	42	40-49	Mixed	Married	72	1.61	27.78	Overweight	Yes	No	Without complications	Without complications		33	32	27	27	23	23	21	20	4	3	2	1	2	Yes	13.2	No	No	Levothyroxine	Hypothyroidism	No	No	Regular	No	Yes
169	2022-06-13	37	30-39	Mixed	Common-law relationship	68	1.62	25.91	Overweight	No	No	Without complications	Without complications		28	27	23	24	20	21	18	18	4	2	1	1	2	Yes	29.9	No	No	Levothyroxine	Hypothyroidism	condom	Yes	Regular	Yes	Yes
170	2022-06-15	45	40-49	Mixed	Common-law relationship	80	1.71	27.36	Overweight	No	No	Without complications	Without complications		35	35	27	27	23	23	21	21	4	3	2	1	1	Yes	27.24	No	No	No	None	IUD	No	Irregular	Yes	Yes
171	2022-06-15	48	40-49	Mixed	Married	66	1.59	26.11	Overweight	No	No	Without complications	Without complications		33	34	27	28	23	23	21	20	4	3	2	1	0	No	5.91	No	No	No	None	No	No	Regular	Yes	Yes
172	2022-06-17	36	30-39	Mixed	Single	101	1.65	37.1	Obesity II	Yes	No	Without complications	Without complications		33	32	27	27	23	23	21	21	4	3	2	1	4	Yes	16.94	No	No	No	None	No	No	Regular	No	Yes
173	2022-06-17	28	<30	Mixed	Single	59	1.66	21.41	Normal weight	No	No	Without complications	Without complications		24	25	20	20	19	18	16	17	3	1	1	1	4	Yes	35.43	No	No	No	None	No	Yes	Regular	Yes	Yes
174	2022-06-20	45	40-49	Mixed	Single	62	1.59	24.52	Normal weight	No	No	Without complications	Without complications		27	28	24	23	21	22	19	20	4	2	2	1	0	No	6.33	No	No	No	None	No	Yes	Regular	Yes	Yes
175	2022-06-21	28	<30	Mixed	Single	78	1.72	26.37	Overweight	Yes	No	Without complications	Without complications		35	35	27	27	23	23	20	20	4	3	2	1	2	Yes	30.8	No	No	Levetiracepam	Depression	No	Yes	Regular	No	Yes
176	2022-07-07	47	40-49	Mixed	Divorced	55.5	1.58	22.23	Normal weight	Yes	No	Without complications	Without complications		22	20	17	18	16	16	15	15	2	1	1	1	2	Yes	19.3	No	No	No	None	No	No	Irregular	No	No
177	2022-07-07	33	30-39	Hispanic white	Married	73	1.61	28.16	Overweight	No	No	Without complications	Without complications		26	27	23	24	22	21	21	21	3	2	2	1	1	Yes	16.2	No	No	No	None	No	Yes	Regular	Yes	No
178	2022-07-18	45	40-49	Hispanic white	Single	106	1.54	44.7	Obesity III	Yes	No	Without complications	Without complications		28	28	24	25	21	22	19	20	4	3	2	1	1	Yes	24.47	No	No	No	None	Estradiol + Noretisterona 5/50mg	No	Irregular	No	Yes
179	2022-07-18	40	40-49	Hispanic white	Married	55	1.61	21.22	Normal weight	No	No	Without complications	Without complications		37	37	28	28	23	23	21	21	4	4	2	1	1	Yes	9.16	No	No	Levothyroxine	Hypothyroidism	No	Yes	Regular	No	Yes
180	2022-07-19	35	30-39	Mixed	Single	59	1.6	23.05	Normal weight	No	Yes	IIIB	NAC necrosis	Surgical reconstruction	38	38	27	27	23	23	21	21	4	3	2	1	3	Yes	16.2	No	No	No	None	No	Yes	Regular	Yes	Yes
181	2022-07-19	53	50-59	Mixed	Common-law relationship	67	1.59	26.5	Overweight	No	No	Without complications	Without complications		26	27	21	22	19	20	17	18	3	2	1	1	3	Yes	9.74	No	No	No	None	No	Yes	Regular	Yes	Yes
182	2022-07-20	49	40-49	Mixed	Single	61	1.52	26.4	Overweight	No	No	Without complications	Without complications		26	26	21	21	19	19	17	17	3	1	1	1	2	Yes	1.97	No	No	Levothyroxine	Hypothyroidism	No	No	Regular	Yes	Yes
183	2022-07-25	46	40-49	Mixed	Common-law relationship	101	1.66	36.65	Obesity II	No	No	Without complications	Without complications		33	34	27	27	23	23	21	20	4	3	2	1	2	Yes	241.2	No	No	Salbutamol	Asthma	No	No	Irregular	No	Yes
184	2022-07-25	26	<30	Hispanic white	Single	83	1.6	32.42	Obesity I	No	No	Without complications	Without complications		27	28	24	24	21	21	19	19	4	2	1	1	1	Yes	12	No	No	No	None	No	No	Regular	No	Yes
185	2022-07-25	42	40-49	Mixed	Married	58	1.66	21.05	Normal weight	No	No	Without complications	Without complications		28	27	23	24	21	21	19	19	4	2	1	1	0	No	13.07	No	No	No	None	POMEROY	No	Regular	Yes	Yes
186	2022-07-27	51	50-59	Mixed	Married	89	1.6	34.77	Obesity I	No	No	Without complications	Without complications		22	22	20	20	18	18	17	17	2	1	1	1	1	Yes	9.17	No	No	Losartan	Hypertension	No	No	Irregular	No	No
187	2022-07-29	36	30-39	Mixed	Married	54	1.54	22.77	Normal weight	No	No	Without complications	Without complications		33	32	27	27	23	23	20	20	4	3	2	1	1	Yes	2.33	No	No	No	None	POMEROY	No	Regular	No	Yes
188	2022-07-29	31	30-39	Mixed	Common-law relationship	87	1.6	33.98	Obesity I	No	No	Without complications	Without complications		28	29	24	25	22	23	21	21	4	3	2	1	2	Yes	15.66	No	No	Enalapril	Hypertension	No	No	Regular	Yes	Yes
189	2022-08-05	44	40-49	Hispanic white	Common-law relationship	71.3	1.68	25.26	Overweight	No	No	Without complications	Without complications		29	28	26	26	25	24	22	21	4	3	3	2	0	No	15.66	No	Yes	No	None	No	No	Regular	No	No
190	2022-08-08	33	30-39	Mixed	Single	61.7	1.6	24.1	Normal weight	No	No	Without complications	Without complications		25	26	19	20	18	19	17	18	3	1	1	1	0	No	10.2	No	No	No	None	No	No	Regular	No	No
191	2022-08-11	24	<30	Mixed	Common-law relationship	56	1.6	21.88	Normal weight	Yes	No	Without complications	Without complications		22	23	20	19	18	19	18	18	2	1	1	1	0	No	26	Yes	No	No	None	No	No	Irregular	No	No
192	2022-08-12	46	40-49	Mixed	Married	66.6	1.52	28.83	Overweight	No	No	Without complications	Without complications		30	28	25	24	23	22	21	22	4	3	2	2	2	Yes	17.8	No	No	No	None	No	No	Irregular	No	Yes
193	2022-08-19	42	40-49	Mixed	Married	67	1.64	24.91	Normal weight	No	No	Without complications	Without complications		25	24	23	22	22	21	22	21	3	3	2	2	1	Yes	14.3	No	No	No	None	No	Yes	Regular	Yes	No
194	2022-08-22	46	40-49	Mixed	Common-law relationship	85.2	1.65	31.29	Obesity I	No	No	Without complications	Without complications		32	31	26	27	24	23	22	21	4	3	2	2	2	Yes	7.89	No	No	No	None	No	No	Irregular	No	No
195	2022-08-27	29	<30	Hispanic white	Common-law relationship	88.2	1.65	32.4	Obesity I	No	No	Without complications	Without complications		34	32	26	26	24	24	22	22	4	3	2	2	1	Yes	14.08	No	No	No	None	No	No	Regular	No	No
196	2022-09-09	48	40-49	Hispanic white	Married	87.2	1.55	36.3	Obesity II	No	No	Without complications	Without complications		29	28	25	24	23	22	22	21	4	3	2	1	0	No	22.3	No	No	Fluoxetine	Depression	POMEROY	No	Regular	No	No
197	2022-10-17	44	40-49	Mixed	Common-law relationship	79.2	1.56	32.54	Obesity I	No	No	Without complications	Without complications		27	25	25	23	23	22	22	22	3	3	2	2	1	Yes	26.5	No	Yes	No	None	No	No	Irregular	No	No
198	2022-10-19	36	30-39	Hispanic white	Single	88.3	1.66	32.04	Obesity I	No	No	Without complications	Without complications		26	27	25	24	24	24	22	22	3	3	2	2	2	Yes	18.9	No	Yes	No	None	No	Yes	Irregular	Yes	No
199	2022-11-05	39	30-39	Mixed	Single	78.9	1.58	31.61	Obesity I	Yes	No	Without complications	Without complications		27	26	25	23	23	22	21	21	3	3	2	1	0	No	17.6	Yes	No	No	None	No	No	Irregular	No	No
200	2023-01-04	28	<30	Mixed	Common-law relationship	74.3	1.66	26.96	Obesity II	No	No	Without complications	Without complications		33	31	25	26	24	24	22	23	4	3	2	2	0	No	19.58	No	No	No	None	No	No	Regular	No	No
201	2023-01-06	34	30-39	Hispanic white	Common-law relationship	72.5	1.65	26.63	Overweight	No	No	Without complications	Without complications		25	24	23	22	21	21	20	19	3	3	1	1	3	Yes	14.63	No	No	No	None	No	Yes	Regular	Yes	No
202	2023-01-06	24	<30	Mixed	Common-law relationship	86.2	1.63	32.44	Obesity I	No	No	Without complications	Without complications		21	21	19	20	19	19	18	19	2	1	1	1	3	Yes	6.78	No	No	No	None	No	Yes	Regular	Yes	No
203	2023-01-11	36	30-39	Hispanic white	Common-law relationship	74.6	1.63	28.08	Overweight	No	No	Without complications	Without complications		26	25	23	23	22	22	20	20	3	2	2	1	2	Yes	17.8	No	Yes	No	None	No	Yes	Regular	Yes	No
204	2023-01-17	41	40-49	Hispanic white	Common-law relationship	76.5	1.66	27.76	Overweight	No	No	Without complications	Without complications		26	26	24	25	20	20	19	19	3	3	1	1	2	Yes	16.3	No	No	No	None	No	Yes	Regular	Yes	No
205	2023-01-18	28	<30	Hispanic white	Married	60.3	1.66	21.88	Normal weight	No	No	Without complications	Without complications		28	29	26	27	24	23	22	22	4	3	2	2	2	Yes	21.03	Yes	No	No	None	No	Yes	Irregular	Yes	No
206	2023-01-23	37	30-39	Hispanic white	Common-law relationship	74.5	1.65	27.36	Overweight	No	No	Without complications	Without complications		25	25	22	21	19	19	18	18	3	2	1	1	3	Yes	11.08	No	No	No	None	No	Yes	Regular	Yes	No
207	2023-01-25	48	40-49	African-Colombian	Single	69.9	1.56	28.72	Overweight	Yes	No	Without complications	Without complications		26	27	23	22	21	21	19	20	3	2	1	1	0	No	12.3	No	No	No	None	No	Yes	Regular	Yes	No
208	2023-01-30	46	40-49	Mixed	Married	72.6	1.61	28.01	Overweight	No	No	Without complications	Without complications		28	28	25	24	19	18	18	18	4	3	1	1	0	No	14.6	No	No	No	None	No	No	Regular	No	No
209	2023-02-01	26	<30	Hispanic white	Divorced	60.3	1.52	26.1	Overweight	Yes	No	Without complications	Without complications		23	23	21	22	20	21	20	21	2	2	1	1	2	Yes	145	No	No	No	None	No	Yes	Regular	Yes	No
210	2023-02-13	44	40-49	African-Colombian	Single	59.4	1.61	22.92	Normal weight	No	No	Without complications	Without complications		23	22	20	20	19	20	19	19	2	1	1	1	2	Yes	13.02	No	Yes	No	None	No	Yes	Regular	Yes	No
211	2023-02-22	42	40-49	Hispanic white	Single	83.2	1.63	31.31	Obesity I	No	No	Without complications	Without complications		26	25	24	24	23	22	21	20	3	2	2	1	1	Yes	22.48	No	Yes	No	None	No	Yes	Regular	Yes	No
212	2023-03-27	46	40-49	Hispanic white	Single	70.8	1.66	25.69	Overweight	Yes	No	Without complications	Without complications		25	25	22	21	20	19	18	17	3	1	1	1	1	Yes	16.5	No	No	No	None	No	Yes	Regular	Yes	No
213	2023-04-15	38	30-39	Mixed	Single	70.2	1.64	26.1	Overweight	Yes	No	Without complications	Without complications		24	23	21	22	20	19	18	18	2	2	1	1	3	Yes	13.2	No	No	No	None	No	Yes	Regular	Yes	No
214	2023-06-17	39	30-39	Mixed	Single	88.6	1.65	32.54	Obesity I	No	No	Without complications	Without complications		31	31	26	25	19	19	19	19	4	3	1	1	1	Yes	19.5	No	No	No	None	No	No	Regular	No	No
215	2023-06-23	45	40-49	Mixed	Divorced	69.3	1.53	29.6	Overweight	No	No	Without complications	Without complications		28	28	25	25	23	23	22	22	4	3	2	2	1	Yes	19.56	No	No	No	None	No	No	Irregular	No	No
216	2023-07-07	32	30-39	Mixed	Single	74.3	1.63	27.96	Overweight	No	No	Without complications	Without complications		27	27	23	22	21	20	19	19	3	2	1	1	0	No	16.8	No	No	No	None	No	No	Regular	No	Yes
217	2023-07-14	36	30-39	Mixed	Single	98.6	1.64	36.66	Obesity II	Yes	No	Without complications	Without complications		27	26	24	22	20	18	18	17	3	2	1	1	1	Yes	20.3	No	No	Sertraline	Depression	No	No	Regular	No	No
218	2023-08-04	33	30-39	Mixed	Married	66.9	1.63	25.18	Overweight	Yes	No	Without complications	Without complications		23	24	21	21	20	21	17	18	2	1	1	1	1	Yes	12.4	No	No	No	None	No	Yes	Regular	Yes	No
219	2023-08-11	42	40-49	Mixed	Single	78.7	1.65	28.91	Overweight	Yes	No	Without complications	Without complications		25	26	22	22	20	20	18	19	3	2	1	1	1	Yes	6.84	No	No	No	None	No	No	Regular	No	No
220	2023-08-16	33	30-39	Mixed	Married	75.2	1.62	28.65	Overweight	Yes	No	Without complications	Without complications		30	31	25	24	22	20	16	16	4	3	2	1	2	Yes	26.8	No	No	No	None	No	No	Regular	No	Yes
221	2023-08-29	31	30-39	Hispanic white	Married	79.5	1.61	30.67	Obesity I	Yes	No	Without complications	Without complications		27	26	23	22	21	21	19	19	3	2	1	1	2	Yes	18.9	No	No	No	None	No	No	Regular	No	No
222	2023-08-29	49	40-49	Hispanic white	Married	69.6	1.55	28.97	Overweight	Yes	No	Without complications	Without complications		31	31	26	25	20	20	18	18	4	3	1	1	1	Yes	31.3	No	No	No	None	No	No	Regular	No	Yes
223	2023-08-30	46	40-49	Mixed	Divorced	80.2	1.59	31.72	Obesity I	No	No	Without complications	Without complications		26	27	24	23	22	21	18	18	3	2	2	1	4	Yes	24.02	No	No	No	None	No	No	Regular	No	No
224	2023-09-11	46	40-49	Hispanic white	Married	56.3	1.49	25.36	Overweight	Yes	No	Without complications	Without complications		26	25	23	21	20	20	19	19	3	2	1	1	5	Yes	22.1	No	No	No	None	No	No	Regular	No	Yes
225	2023-10-09	45	40-49	African-Colombian	Single	75.6	1.62	28.81	Overweight	No	No	Without complications	Without complications		25	26	24	22	20	21	19	19	3	2	1	1	6	Yes	26.8	No	No	No	None	No	No	Regular	No	No
226	2023-10-25	49	40-49	African-Colombian	Common-law relationship	76.5	1.56	31.43	Obesity I	No	No	Without complications	Without complications		27	26	23	22	18	19	17	17	3	2	1	1	2	Yes	7.8	No	No	No	None	No	No	Regular	No	No
227	2023-11-20	34	30-39	Mixed	Single	74.3	1.66	26.96	Overweight	No	No	Without complications	Without complications		24	24	20	19	19	19	20	19	2	1	1	1	0	No	16.56	No	No	No	None	No	No	Regular	No	No
228	2023-11-27	24	<30	Mixed	Common-law relationship	80.2	1.7	27.75	Overweight	Yes	No	Without complications	Without complications		22	23	21	20	20	19	19	18	2	1	1	1	3	Yes	23.02	No	No	No	None	No	No	Regular	No	No
229	2023-12-01	46	40-49	Hispanic white	Common-law relationship	66.9	1.57	27.14	Overweight	Yes	No	Without complications	Without complications		30	29	26	24	22	21	20	19	4	3	2	1	0	No	24.2	No	No	No	None	No	No	Regular	No	No
230	2023-12-02	40	40-49	Hispanic white	Married	70.8	1.63	26.65	Overweight	Yes	No	Without complications	Without complications		25	26	22	20	21	20	19	19	3	2	1	1	4	Yes	17.8	No	No	No	None	No	Yes	Regular	Yes	No
231	2023-12-03	45	40-49	Mixed	Married	77.6	1.71	26.54	Overweight	Yes	Yes	IIIB	Seroma	Surgical drainage	29	31	25	23	22	20	19	19	4	3	2	1	2	Yes	9.8	No	No	Venlafaxine	Depression	No	No	Irregular	Yes	No
